# Supplementary material
Source: PubMed Central journal article supplement (PMC7577586)
Supplement: NIHMS1622393-supplement-Supplemental_Table_S1.pdf [file NIHMS1622393-supplement-Supplemental_Table_S1.pdf]

## **DATA SUPPLEMENT**

### **A machine learning strategy for gut microbiome-based diagnostic screening of cardiovascular disease**

**Sachin Aryal, Ahmad Alimadadi, Ishan Manandhar, Bina Joe\* and Xi Cheng\***

Bioinformatics & Artificial Intelligence Laboratory, Center for Hypertension and Precision Medicine, Program in Physiological Genomics, Department of Physiology and Pharmacology, University of Toledo College of Medicine and Life Sciences, Toledo, OH 43614, USA

**Running title:** AI and microbiome for CVD diagnosis

#### **\*Corresponding Authors**

Xi Cheng, Ph.D.

Bioinformatics & Artificial Intelligence Laboratory

Center for Hypertension and Precision Medicine

Program in Physiological Genomics

Department of Physiology and Pharmacology

University of Toledo College of Medicine and Life Sciences

Block Health Science Bldg. Rm 320, 3000 Arlington Ave., Toledo, OH 43614, USA

Phone: 419-383-4076      Email: Xi.Cheng@utoledo.edu

Bina Joe, Ph.D., FAHA, FCVS (APS)

Bioinformatics & Artificial Intelligence Laboratory

Center for Hypertension and Precision Medicine

Program in Physiological Genomics

Department of Physiology and Pharmacology

University of Toledo College of Medicine and Life Sciences

Block Health Science Bldg. Rm 237, 3000 Arlington Ave., Toledo, OH 43614, USA

Phone: 419-383-4144

Email: [bina.joe@utoledo.edu](mailto:bina.joe@utoledo.edu)

**Supplementary Table S1. Thirty-nine differential bacterial taxa and their LDA scores.**

| Taxonomic Features                                                                                           | Enriched Group | LDA Score |
|--------------------------------------------------------------------------------------------------------------|----------------|-----------|
| k__Bacteria.p__Proteobacteria.c__Betaproteobacteria.o__Neisseriales.f__Neisseriaceae.g__Neisseria            | non-cvd        | 2.22      |
| k__Bacteria.p__Firmicutes.c__Clostridia.o__Clostridiales.f__Veillonellaceae.g__Acidaminococcus               | cvd            | 2.29      |
| k__Bacteria.p__Proteobacteria.c__Alphaproteobacteria.o__RF32.f__                                             | non-cvd        | 2.60      |
| k__Bacteria.p__Firmicutes.c__Clostridia.o__Clostridiales.f__Peptostreptococcaceae                            | non-cvd        | 2.58      |
| k__Bacteria.p__Firmicutes.c__Clostridia.o__Clostridiales.f__Ruminococcaceae.g__Ruminococcus                  | non-cvd        | 3.32      |
| k__Bacteria.p__Firmicutes.c__Clostridia.o__Clostridiales.f__Veillonellaceae.g__Veillonella                   | cvd            | 2.62      |
| k__Bacteria.p__Proteobacteria.c__Betaproteobacteria.o__Neisseriales.f__Neisseriaceae                         | non-cvd        | 2.26      |
| k__Bacteria.p__Cyanobacteria.c__4C0d_2.o__YS2                                                                | non-cvd        | 2.55      |
| k__Bacteria.p__Proteobacteria.c__Alphaproteobacteria.o__RF32.f__.g__                                         | non-cvd        | 2.61      |
| k__Bacteria.p__Cyanobacteria.c__4C0d_2.o__YS2.f__.g__                                                        | non-cvd        | 2.56      |
| k__Bacteria.p__Firmicutes.c__Bacilli.o__Bacillales.f__Listeriaceae                                           | cvd            | 2.24      |
| k__Bacteria.p__Proteobacteria.c__Gammaproteobacteria.o__Enterobacteriales.f__Enterobacteriaceae.g__Proteus   | non-cvd        | 3.17      |
| k__Bacteria.p__Firmicutes.c__Erysipelotrichi.o__Erysipelotrichales.f__Erysipelotrichaceae.g__                | non-cvd        | 2.72      |
| k__Bacteria.p__Firmicutes.c__Clostridia.o__Clostridiales.f__Clostridiaceae.g__                               | non-cvd        | 2.23      |
| k__Bacteria.p__Firmicutes.c__Erysipelotrichi.o__Erysipelotrichales.f__Erysipelotrichaceae.g__Eubacterium_    | cvd            | 2.64      |
| k__Bacteria.p__Proteobacteria.c__Alphaproteobacteria.o__RF32                                                 | non-cvd        | 2.62      |
| k__Bacteria.p__Bacteroidetes.c__Bacteroidia.o__Bacteroidales.f__Paraprevotellaceae_                          | non-cvd        | 2.75      |
| k__Bacteria.p__Firmicutes.c__Clostridia.o__Clostridiales.f__Ruminococcaceae.g__Faecalibacterium              | non-cvd        | 3.67      |
| k__Bacteria.p__Proteobacteria.c__Betaproteobacteria.o__Neisseriales                                          | non-cvd        | 2.25      |
| k__Bacteria.p__Proteobacteria.c__Alphaproteobacteria.o__Caulobacterales.f__Caulobacteraceae.g__Brevundimonas | non-cvd        | 2.90      |
| k__Bacteria.p__Proteobacteria.c__Alphaproteobacteria.o__Caulobacterales.f__Caulobacteraceae                  | non-cvd        | 2.87      |
| k__Bacteria.p__Firmicutes.c__Bacilli.o__Bacillales.f__Listeriaceae.g__Listeria                               | cvd            | 2.25      |
| k__Bacteria.p__Bacteroidetes.c__Bacteroidia.o__Bacteroidales.f__Bacteroidaceae                               | cvd            | 4.23      |

|                                                                                                |         |      |
|------------------------------------------------------------------------------------------------|---------|------|
| k__Bacteria.p__Bacteroidetes.c__Bacteroidia.o__Bacteroidales.f__Bacteroidaceae.g__Bacteroides  | cvd     | 4.23 |
| k__Bacteria.p__Firmicutes.c__Clostridia.o__Clostridiales.f__Ruminococcaceae.g__Subdoligranulum | cvd     | 3.35 |
| k__Bacteria.p__Proteobacteria.c__Alphaproteobacteria                                           | non-cvd | 3.19 |
| k__Bacteria.p__Bacteroidetes.c__Bacteroidia.o__Bacteroidales.f__Rikenellaceae.g__Alistipes     | non-cvd | 2.86 |
| k__Bacteria.p__Firmicutes.c__Clostridia.o__Clostridiales.f__Veillonellaceae.g__Megasphaera     | cvd     | 2.77 |
| k__Bacteria.p__Cyanobacteria                                                                   | non-cvd | 2.55 |
| k__Bacteria.p__Bacteroidetes.c__Bacteroidia.o__Bacteroidales.f__Rikenellaceae                  | non-cvd | 3.12 |
| k__Bacteria.p__Cyanobacteria.c__4C0d_2                                                         | non-cvd | 2.56 |
| k__Bacteria.p__Firmicutes.c__Clostridia.o__Clostridiales.f__Lachnospiraceae.g__Lachnospira     | non-cvd | 2.94 |
| k__Bacteria.p__Firmicutes.c__Clostridia.o__Clostridiales.f__Lachnospiraceae.g__Clostridium     | cvd     | 2.99 |
| k__Bacteria.p__Cyanobacteria.c__4C0d_2.o__YS2.f__                                              | non-cvd | 2.55 |
| k__Bacteria.p__Lentisphaerae.c__.o__.f__                                                       | non-cvd | 2.83 |
| k__Bacteria.p__Lentisphaerae.c__.o__.f__.g__                                                   | non-cvd | 2.65 |
| k__Bacteria.p__Lentisphaerae.c__.o__                                                           | non-cvd | 2.82 |
| k__Bacteria.p__Proteobacteria.c__Alphaproteobacteria.o__Caulobacterales                        | non-cvd | 2.85 |
| k__Bacteria.p__Lentisphaerae.c__                                                               | non-cvd | 3.08 |

**Supplementary Table S2. Top 100 highly contributing OTU features and their importance scores.**

| OTU ID | Highly Contributing OTU                                                                                                                                       | Importance Score |
|--------|---------------------------------------------------------------------------------------------------------------------------------------------------------------|------------------|
| 1      | TACGTAGGGGGCAAGCGTTATCCGGATTTACTGGGTGTAAGGGGAGCGTAGACGGACGGGCAAGTCTGAAGTGAAAGGCAGGGGCT<br>CAACCCCTGGACTGCTTTGGAAACTGTCCATCTAGAGTGCCGGAGAGGTAAGCGGAATTCCTAG    | 98.60            |
| 2      | TACGTAGGAGGCAAGCGTTATCCGAATGACTGGGCGTAAAGGGTGCCTAGGTGGTTAGCAAGTTGGCAGCGTAACTCCGGGGCTC<br>AACCTCGGCACTACTGCCAAAAGTGTGAACTTGTGAGTGCAGGAGGGGCAATCGGAATTCCTAG     | 64.05            |
| 3      | TACGTAGGGAGCGAGCGTTATCCGGATTTATTGGGTGTAAGGGTGCCTAGACGGGAAGTCAAGTTAGTTGTGAAATCCCTCGGCTTA<br>ACTGAGGAACTGCAACTAAAAGTATTTTCTTGAGTACTGGAGAGGAAAGTGGGAATTCCTAG     | 63.04            |
| 4      | TACGTAGGGTGCAAGCGTTATCCGAATTTATTGGGCGTAAAGGGCTCGTAGGCGGTTTCGTGCGCTCCGGTGTGAAAGTCCATCGCTTA<br>ACGGTGGATCCGCGCCGGGTACGGGCGGGCTTGAGTGCCTAGGGGAGACTGGAATTCCTAG    | 58.30            |
| 5      | TACGGAGGATCAAGCGTTATCCGGATTTATTGGGTTTAAAGGGTGCCTAGGCGGTTTGATAAGTTAGAGGTGAAATTCGGGGCTCA<br>ACCCTGAACGTGCCTCTAATACTGTTGAGCTAGAGAGTAGTTGCGGTAGGCGGAATGTATGG      | 58.27            |
| 6      | TACGGAGGATCCGAGCGTTATCCGGATTTATTGGGTTTAAAGGGAGCGTAGATGGATGTTAAGTCAGTTGTGAAAGTTTGGGGCTCA<br>ACCGTAAAATTGCAGTTGATACTGGATATCTTGAGTGCAGTTGAGGCAGGCGGAATTCGTGG     | 58.12            |
| 7      | TACGGAGGATCCGAGCGTTATCCGGATTTATTGGGTTTAAAGGGAGCGTAGGTGGACAGTTAAGTCAGTTGTGAAAGTTTGGGGCTCA<br>ACCGTAAAATTGCAGTTGATACTGGCTGTCTTGAGTACAGTAGAGGTGGGCGGAATTCGTGG    | 56.95            |
| 8      | TACGGAGGATCCGAGCGTTATCCGGATTTATTGGGTTTAAAGGGAGCGTAGGTGGATTGTTAAGTCAGTTGTGAAAGTTTGGGGCTCA<br>ACCGTAAAATTGCAGTTGAAACTGGCAGTCTTGAGTACAGTAGAGGTGGGCGGAATTCGTGG    | 55.83            |
| 9      | TACGTAGGGGGCAAGCGTTATCCGGATTTACTGGGTGTAAGGGGAGCGTAGACGGATGGACAAGTCTGATGTGAAAGGCTGGGGCTC<br>AACCCCGGACTGCATTGGAAACTGCCCGTCTTGAGTGCCGGAGAGGTAAGCGGAATTCCTAG     | 55.14            |
| 10     | AACGTAGGTGGCAAGCGTTGTCGGGAATTTACTGGGTGTAAGGGGAGCGCAGGCGGACCGGCAAGTTGGAAGTGAATCTATGGGCTC<br>AACCCATAAATTGCTTTCAAAGTGTGGCCTTGAGTAGTGCAGAGGTAGGCGGAATTCCTAG      | 53.78            |
| 11     | TACGGAGGGTGCAAGCGTTAATCGGAATTTACTGGGCGTAAAGCGCACGCAGGCGGTTTGTAAAGTCAGATGTGAAATCCCCGGGCTCA<br>ACCTGGGAACTGCATCTGATACTGGCAAGCTTGAGTCTCGTAGAGGGGGTAGAATTCAGG     | 53.17            |
| 12     | TACGGAGGATCCGAGCGTTATCCGGATTTATTGGGTTTAAAGGGAGCGTAGGTGGATTGTTAAGTCAGTTGTGAAAGTTTGGGGCTCA<br>ACCGTAAAATTGCAGTTGAAACTGGGAGTCTTGAGTACAGTAGAGGTGGGCGGAATTCGTGG    | 52.74            |
| 13     | TACGTAGGTGGCAAGCGTTGTCGGGAATTTATTGGGCGTAAAGGGGCGCGCAGGCGGCATCGCAAGTCCGGTCTTAAAAGTGGGGGCTT<br>AACCCCGTGAGGGGACCGAAACTGTGAAGCTCGAGTGTGCGGAGAGGAAAGCGGAATTCCTAGT | 45.47            |
| 14     | TACGGAGGATCCGAGCGTTATCCGGATTTATTGGGTTTAAAGGGAGCGTAGGCGGACGCTTAAGTCAGTTGTGAAAGTTTGGGGCTCA<br>ACCGTAAAATTGCAGTTGATACTGGGTGTCTTGAGTACAGTAGAGGCAGGCGGAATTCGTGG    | 44.77            |
| 15     | TACGTAGGGTGCAAGCGTTATCCGAATTTATTGGGCGTAAAGGGCTCGTAGGCGGTTTCGTGCGCTCCGGTGTGAAAGTCCATCGCTTA<br>ACGGTGGATCTGCGCCGGGTACGGGCGGGCTGGAGTGCCTAGGGGAGACTGGAATTCCTAG    | 43.71            |
| 16     | TACGTAGGGAGCAAGCGTTATCCGGATTTATTGGGTGTAAGGGTGCCTAGACGGGACAACAAGTTAGTTGTGAAATCCCTCGGCTTA<br>ACTGAGGAACTGCAACTAAAAGTATTTCTTGAGTGTGGAGAGGAAAGTGGGAATTCCTAG       | 43.65            |

|    |                                                                                                                                                              |       |
|----|--------------------------------------------------------------------------------------------------------------------------------------------------------------|-------|
| 17 | TACGTAGGGT GCGAGCGTTAATCGGAATTACTGGGCGTAAAGGGTGCGCAGGCGGTTGAGTAAGACAGATGTGAAATCCCCGAGCTT<br>AACTCGGGAATGGCATATGTGACTGCTCGACTAGAGTGTGTGAGAGGGAGGTGGAATTCACG   | 42.95 |
| 18 | TACGTAGGGGGCTAGCGTTATCCGGATTTACTGGGCGTAAAGGGTGCGTAGGCGGCTTTTTAAGTCAGGAGTGAAAGGCTACGGCTCA<br>ACCGTAGTAAGCTCTTGAAACTGGAGGACTTGAGTGCAGGAGAGGAGAGTGGAAATTCCTAGT  | 40.96 |
| 19 | TACGTAGGGGGCAAGCGTTATCCGGATTTACTGGGTGTAAGGGGAGCGTAGACGGTGTGGCAAGTCTGATGTGAAAGGCATGGGCTC<br>AACCTGTGGACTGCATTGAAACTGTCATACTTGAGTGCCGGAGGGGTAAGCGGAATTCCTAG    | 40.27 |
| 20 | AACGTAGGGTGCAAGCGTTGTCGGGAATTACTGGGTGTAAGGGGAGCGCAGGCGGGAAGACAAGTTGGAAGTGAAAACCATGGGCT<br>CAACCCATGAATTGCTTTCAAACCTGTTTTCTTGAGTAGTGCAGAGGTAGATGGAATTCCTAG    | 38.22 |
| 21 | TACGTAGGGGGCAAGCGTTATCCGGATTTACTGGGTGTAAGGGGAGCGTAGACGGCACGGCAAGCCAGATGTGAAAGCCCCGGGGCTC<br>AACCCCGGACTGCATTTGAAACTGCTGAGCTAGAGTGTGCGGAGAGGCAAGTGGAAATTCCTAG | 37.70 |
| 22 | TACGTAGGTGGCGAGCGTTATCCGGAATTATTGGGCGTAAAGAGGGAGCAGGCGGCACTAAGGGTCTGTGGTGAAAGATCGAAGCTT<br>AACTTCGGTAAGCCATGGAAACCGTAGAGCTAGAGTGTGTGAGAGGATCGTGGAAATTCATGT   | 37.51 |
| 23 | AACGTAGGTCACAAGCGTTGTCGGGAATTACTGGGTGTAAGGGGAGCGCAGGCGGGAAGACAAGTTGGAAGTGAAATCTATGGGCTC<br>AACCCATAAACTGCTTTCAAACCTGTTTTCTTGAGTAGTGCAGAGGTAGGCGGAATTCCTAG    | 36.67 |
| 24 | TACGTAGGGGGCAAGCGTTATCCGGAATTACTGGGTGTAAGGGTGCGTAGGTGGTATGGCAAGTCAGAAGTGAAAACCCAGGGCTT<br>AACTCTGGGACTGCTTTGAAACTGTCAGACTGGAGTGCAGGAGAGGTAAGCGGAATTCCTAG     | 36.03 |
| 25 | TACGTAGGGAGCGAGCGTTGTCGGGAATTACTGGGTGTAAGGGGAGCGTAGGCGGGATGGCAAGTCAGATGTGAAAACCTATGGGCTC<br>AACCCATAGACTGCATTTGAAACTGTTGTTCTTGAGTAGGTAAGCGGAATTCCTAG         | 35.73 |
| 26 | AACGTAGGTCACAAGCGTTGTCGGGAATTACTGGGTGTAAGGGGAGCGCAGGCGGGGAGAACAAGTTGGAAGTGAAATCCATGGGCTC<br>AACCCATGAAGTCTTTCAAACCTGTTTTCTTGAGTAGTGCAGAGGTAGGCGGAATTCCTAG    | 34.95 |
| 27 | TACGGAGGATGCGAGCGTTATCCGGATTTATTGGGTTTAAAGGGTGCGTAGGTGGTATTTAAGTCAGCGGTGAAAGTTTGTGGCTCA<br>ACCATAAAATTGCCGTTGAAACTGGGTTACTTGAGTGTGTTGAGGTAGGCGGAATGCGTGG     | 34.91 |
| 28 | AACGTAGGGTGCAAGCGTTGTCGGGAATTACTGGGTGTAAGGGGAGCGCAGGCGGACCGGCAAGTTGGAAGTGAAAACCTATGGGCTC<br>AACCCATAAATTGCTTTCAAACCTGCTGGCCTTGAGTAGTGCAGAGGTAGGTGGAATTCCTAG  | 34.72 |
| 29 | TACGGAGGATGCGAGCGTTATCCGGATTTATTGGGTTTAAAGGGAGCGCAGACGGGAGATTAAGTCAGTTGTGAAAGTTTGC GGCTCA<br>ACCGTAAAATTGCAGTTGATACTGGTTTCTTGAGTGCAGTTGAGGCAGGCGGAATTCCTAG   | 34.51 |
| 30 | TACGTATGGTGCAAGCGTTATCCGGATTTACTGGGTGTAAGGGGAGCGCAGGCGGTGCGGCAAGTCTGATGTGAAAGCCCCGGGGCTC<br>AACCCCGTACTGCATTGAAACTGTCGTA TAGAGTGTGCGGAGGGGTAAGCGGAATTCCTAG   | 34.29 |
| 31 | TACGTAGGGAGCGAGCGTTATCCGGAATTATTGGGTGTAAGGGTGCGTAGACGGGAGAACAAGTTAGTTGTGAAATACCTCGGCTCA<br>ACTGAGGAACTGCAACTAAAACCTGACTTCTTGAGTGCAGGAGAGGTAAGTGGAAATTCCTAG   | 33.97 |
| 32 | TACGTAGGGGGCAAGCGTTATCCGGATTTACTGGGTGTAAGGGGAGCGTAGACGGCAAGGCAAGTCTGATGTGAAAACCCAGGGCTT<br>AACCCCTGGGACTGCATTGAAACTGCTGGCTCGAGTGCCGGAGAGGTAAGCGGAATTCCTAG    | 33.75 |
| 33 | TACGTAGGGGGCAAGCGTTATCCGGATTTACTGGGTGTAAGGGGAGCGTAGACGGACTGGCAAGTCTGATGTGAAAGGCGGGGGCTC<br>AACCCCTGGACTGCATTGAAACTGTTAGTCTTGAGTGCCGGAGAGGTAAGCGGAATTCCTAG    | 33.68 |
| 34 | TACGTAGGTGGCAAGCGTTGTCGGGAATTATTGGGCGTAAAGCGCGCGCAGGCGGATTGGTCAGTCTGTCTTAAAAGTTCCGGGGCTTA<br>ACCCCGTGATGGGATGGAAACTGCCAATCTAGAGTATCGGAGAGGAAAGTGGAAATTCCTAGT | 33.32 |

|    |                                                                                                                                                             |       |
|----|-------------------------------------------------------------------------------------------------------------------------------------------------------------|-------|
| 35 | TACGGAGGATCCGAGCGTTATCCGGATTTATTGGGTTTAAAGGGTGCCTAGGCGGCCTTTAAGTCAGCGGTGAAAGTCTGTGGCTCA<br>ACCATAGAATTGCCGTTGAAACTGGGGGGCTTGAGTATGTTTGAGGCAGGCCGAATGCGTGG   | 33.28 |
| 36 | TACGTAGGGGGCTAGCGTTATCCGGAATTAAGTGGGCGTAAAGGGTGCCTAGGTGGTTTCTTAAGTCAGAGGTGAAAGGCTACGGCTCA<br>ACCGTAGTAAGCCTTTGAAACTGGGAACTTGAGTGCAGGAGAGGAGAGTGAATTCTAGT    | 33.18 |
| 37 | TACGGAGGGTGCAAGCGTTAATCGGAATCACTGGGCGTAAAGCGCACGTAGGCGGCTTGGTAAGTCAGGGGTGAAATCCCACAGCCC<br>AACTGTGGAAGTGCCTTTGATACTGCCAGGCTTGAGTACCGGAGAGGGTGGCGGAATTCCAGG  | 32.52 |
| 38 | TACGGAGGATGCGAGCGTTATCCGGATTTATTGGGTTTAAAGGGTGCCTAGGTGGTTAATTAAGTCAGCGGTGAAAGTTTGTGGCTCA<br>ACCATAAAATTGCCGTTGAAACTGGTTGACTTGAGTATATTTGAGGTAGGCGGAATGCGTGG  | 32.52 |
| 39 | TACGTAGGTCCCAGCGTTGTCCGGATTTATTGGGCGTAAAGCGAGCGCAGGCGGTTTGATAAGTCTGAAGTTAAAGGCTGTGGCTCA<br>ACCATAGTTCGCTTTGGAAACTGTCAAACCTTGAGTGCAGAAGGGGAGAGTGAATTCCATGT   | 31.85 |
| 40 | TACGTATGGAGCAAGCGTTATCCGGATTTACTGGGTGTAAAGGGAGTGTAGGTGCCATGCAAGTCAGAAGTAAAAATCCGGGGCTC<br>AACCCCGGAAGTGCCTTTGAAACTGTAAAGCTGGAGTGCAGGAGGGGTGAGTGAATTCTAG     | 31.38 |
| 41 | TACGTAGGGGGCAAGCGTTATCCGGATTTACTGGGTGTAAAGGGAGCGTAGACGGCGCAGCAAGTCTGATGTGAAAGGCAGGGGCTT<br>AACCCCTGGACTGCATTGAAACTGCTGTGCTTGAGTGCCGGAGGGGTAAGCGGAATTCTAG    | 31.20 |
| 42 | TACAGAGGTCTCAAGCGTTGTTCCGAATCACTGGGCGTAAAGCGTGCCTAGGCTGTTTCGTAAGTCGTGTGTGAAAGGCGCGGGCTCA<br>ACCCGCGGACGGCACATGATACTGCGAGACTAGAGTAATGGAGGGGGAACCGGAATTCTCGG  | 30.87 |
| 43 | TACAGAGGGTGCAAGCGTTAATCGGAATTAAGTGGGCGTAAAGCGCGCTAGGTGGTTTGTAAAGTTGAATGTGAAATCCCCGGGCTCA<br>ACCTGGGAACTGCATCAAAACTGGCAAGCTAGAGTATGGTAGAGGGTAGTGAATTCTAG     | 30.38 |
| 44 | TACGTAGGGAGCAAGCGTTGTCCGGATTTACTGGGTGTAAAGGGTGCCTAGGCGGCTTTCGCAAGTCAGATGTGAAATCTATGGGCTCA<br>ACCCATAAAGTGCATTTGAAACTGTAGAGCTTGAGTGAAGTAGAGGCAGGCGGAATTCCCCG | 29.68 |
| 45 | TACGGAGGATCAAGCGTTATCCGGATTTATTGGGTTTAAAGGGTGCCTAGGCGGTTTGATAAGTTAGAGGTGAAATCCCCGGGGCTTA<br>ACTCCGGAAGTGCCTTAATACTGTTAGACTAGAGAGTAGTTGCGGTAGGCGGAATGTATGG   | 29.62 |
| 46 | TACGTATGGAGCAAGCGTTATCCGGATTTACTGGGTGTAAAGGGAGTGTAGGTGCCAGGCAAGTCAGAAGTAAAAGCCCGGGGCTC<br>AACCCCGGGACTGCTTTTGAAGTGCAGGGCTAGAGTGCAGGAGGGGCAAGTGAATTCTAG      | 29.38 |
| 47 | TACGTAGGGGGCAAGCGTTATCCGGAATTAAGTGGGCGTAAAGGGTGCCTAGGTGGTATGGCAAGTCAGAAGTAAAACCCAGGGCTT<br>AACTCTGGGACTGCTTTTGAAGTGCAGACTAGAGTGCAGGAGAGGTAAGCGGAATTCTAG     | 28.85 |
| 48 | AACGTAGGTCAAGCGTTGTCCGGAATTAAGTGGGCGTAAAGGGAGCGCAGGCGGGAAGACAAGTTGGAAGTAAAATCCATGGGCTC<br>AACCCATGAAGTGCCTTTCAAACTGTTTTCTTGAGTAGTGCAGAGGTAGGCGGAATTCCCCG    | 28.00 |
| 49 | TACGTAGGGGGCGAGCGTTATCCGGATTCATTGGGCGTAAAGCGCGCTAGGCGGCCCGGAGGCCGGGGGTGCAAGCGGGGGGCT<br>CAACCCCGGAAGCCCGGAACCTCCGCGGCTTGGGTCCGGTAGGGGAGGGTGAACACCCGG        | 27.13 |
| 50 | TACGTAGGTGGCAAGCGTTGTCCGGATTTACTGGGTGTAAAGGGCGTGCAGCCGGTCTGCAAGTCAGATGTGAAATCCATGGGCTCA<br>ACCCATGAAGTGCATTTGAAACTGTAGATCTTGAGTGTGCGAGGGGCAATCGGAATTCTAG    | 27.03 |
| 51 | TACGTATGGAGCAAGCGTTATCCGGATTTACTGGGTGTAAAGGGTGCCTAGGTGGCAGTGCAGTGCAGATGTGAAAGCCGGGGCTC<br>AACCCCGGAGTGCATTTGAAACTGCATAGCTAGAGTACAGGAGAGGCAGGCGGAATTCTAG     | 26.99 |
| 52 | TACGGAGGGTGCAAGCGTTAATCGGAATTAAGTGGGCGTAAAGCGCACGCAGGCGGCTGTGCAAGTCGGATGTGAAATCCCCGGGCTC<br>AACCTGGGAAGTGCATTGAAACTGGCAGGCTAGAGTCTTGAGAGGGGGGTAGAATTCCAGG   | 26.83 |

|    |                                                                                                                                                            |       |
|----|------------------------------------------------------------------------------------------------------------------------------------------------------------|-------|
| 53 | TACGTAGGGGGCAAGCGTTATCCGGATTTACTGGGTGTAAGGGGAGCGTAGACGGCGAAGCAAGTCTGAAGTGAAAACCCAGGGCTC<br>AACCTGGGACTGCTTTGAAACTGTTTTGCTAGAGTGTCGGAGAGGTAAGTGAATTCCTAG    | 26.41 |
| 54 | TACGTATGGAGCAAGCGTTATCCGGATTTACTGGGTGTAAGGGGTGCGTAGGTGGCAGTGCAAGTCAGATGTGAAAGGCCGGGGCTC<br>AACCCCGGAGCTGCATTTGAAACTGCTCGGCTAGAGTACAGGAGAGGCAGGCCGAATTCCTAG | 26.40 |
| 55 | TACGTAGGTGGCAAGCGTTATCCGGATTTACTGGGTGTAAGGGCGTGTAGGCGGGATTGCAAGTCAGATGTGAAAAGTGGGGGCTC<br>AACCTCCAGCCTGCATTTGAAACTGTAGTTCTTGAGTGCTGGAGAGGCAATCGGAATTCCTG   | 26.00 |
| 56 | TACGTATGGTGCAAGCGTTATCCGGATTTACTGGGTGTAAGGGGAGCGTAGGTGGCAAGGCAAGCCAGAAGTAAAACCCGGGGCTC<br>AACCGCGGGATTGCTTTGAAACTGTCATGCTAGAGTGCAGGAGGGGTGAGCGGAATTCCTAG   | 25.94 |
| 57 | TACGTAGGGGGCAAGCGTTATCCGGATTTACTGGGTGTAAGGGGAGCGTAGACGGAATGGCAAGTCTGATGTGAAAGGCCGGGGCTC<br>AACCCCGGACTGCATTGAAACTGTCAATCTAGAGTACCGGAGGGGTAAGTGAATTCCTAG    | 25.88 |
| 58 | TACGGAGGATCCGAGCGTTATCCGGATTTATTGGGTTAAAGGGAGCGTAGGTGGACTGGTAAGTCAGTTGTGAAAGTTTGGCGCTCA<br>ACCGTAAAATTGCAGTTGATACTGTCAGTCTTGAGTACAGTAGAGGTGGGCGGAATTCCTGG  | 25.74 |
| 59 | TACGTAGGGAGCAAGCGTTATCCGGATTTACTGGGTGTAAGGGCGCGCAGGCGGGCCGGCAAGTTGGAAGTAAAATCTATGGGCTT<br>AACCCATAAACTGCTTTCAAACTGCTGGTCTTGAGTGATGGAGAGGCAGGCGGAATTCCTG    | 25.53 |
| 60 | TACGTAGGGGGCGAGCGTTGTCGGGAATGATTGGGCGTAAAGGGCGCGTAGGCGGCTGCTAAGTCTGGAGTGAAAGTCTGCTTTC<br>AAGGTGGGAATTGCTTTGATACTGGTGGGCTGGAGTGCAGGAGAGGAAAGCGGAATTACCGG    | 25.36 |
| 61 | TACGTAGGTGGCAAGCGTTGTCGGGAATTTGGGCGTAAAGCGCGCGCAGGCGGCTTCCAAGTCCCTTTAAAAGTGCGGGGCTTA<br>ACCCCGTGATGGGAAGGAACTGGGAAGCTGGAGTATCGGAGAGGAAAGTGAATTCCTAGT       | 25.32 |
| 62 | TACGGAGGGTGCAAGCGTTGTCGGGAATCATTGGGCGTAAAGAGTTCTGAGGTGGTTTGTAAAGTTTGGTGTTAAATGCAGAGGCTCA<br>ACTTCTGTTCCGCATCGGATACTGGCAGACTAGAATGCGGTAGAGGTAAGGGAATTCCTGG  | 24.99 |
| 63 | TACGTATGGAGCAAGCGTTATCCGGATTTACTGGGTGTAAGGGGAGTGTAGGTGGCCATGCAAGTCAGAAGTAAAATCCGGGGCTC<br>AACCCCGAAGTCTTTTGAAGCTGTAAGGCTAGAGTGCAGGAGGGGTGAGTGGAATTCCTAG    | 24.92 |
| 64 | TACGTAGGGGGCAAGCGTTATCCGGATTTACTGGGTGTAAGGGGAGCGCAGGCGGCATGATAAGTCTGATGTGAAAACCAAGGCTC<br>AACCATGGGACTGCATTGAAACTGTCGTGCTGGAGTGTGCGAGAGGTAAGCGGAATTCCTAG   | 24.88 |
| 65 | TACGTAGGTGGCAAGCGTTGTCGGATTTATTGGGCGTAAAGCGAGCGCAGGCGGTTTCTTAAGTCTGATGTGAAAGCCCCGGCTCA<br>ACCGGGGAGGGTCATTGAAACTGGGAGACTTGAGTGCAGAAGAGGAGAGTGAATTCATG      | 24.83 |
| 66 | TACGGAGGATCCGAGCGTTATCCGGATTTATTGGGTTAAAGGGAGCGTAGGCGGTTGTTAAGTCAAGTTGTGAAAGTTTGGCGCTCA<br>ACCGTAAAATTGCAGTTGATACTGGCGACCTTGAGTGCAACAGAGGTAGGCGGAATTCCTGG  | 24.65 |
| 67 | TACGTATGGTGCAAGCGTTATCCGGATTTACTGGGTGTAAGGGGAGCGTAGACGGCTGTGTAAGTCTGAAGTGAAAGCCCGGGGCTCA<br>AACCCGGGACTGCTTTGAAACTATGCAGCTAGAGTGTGCGAGAGGTAAGTGAATTCCTAG   | 24.40 |
| 68 | TACGTATGGTGCAAGCGTTATCCGGATTTACTGGGTGTAAGGGGAGCGTAGACGGATGGGCAAGTCTGATGTGAAAACCCGGGGCTC<br>AACCCCGGACTGCATTGAAACTGTTTATCTAGAGTGTGCGAGAGGTAAGTGAATTCCTAG    | 24.36 |
| 69 | TACGGAGGATCCGAGCGTTATCCGGATTTATTGGGTTAAAGGGAGCGTAGGCGGATTGTTAAGTCAAGTTGTGAAAGTTTGGCGCTCA<br>ACCGTAAAATTGCAGTTGATACTGGCAGTCTTGAGTGCAGTAGAGGTGGGCGGAATTCCTGG | 24.23 |
| 70 | TACGTAGGTGGCAAGCGTTGTCGGATTTACTGGGTGTAAGGGCGTGTAGGCGGAGAAGCAAGTCAGAAGTAAAATCCATGGGCTT<br>AACCCATGAAGTCTTTGAAACTGTTTCCCTTGAGTATCGGAGAGGCAGGCGGAATTCCTAG     | 24.21 |



|    |                                                                                                                                                            |       |
|----|------------------------------------------------------------------------------------------------------------------------------------------------------------|-------|
| 71 | AACGTAGGGTGCAAGCGTTGTCCGAATTACTGGGTGTAAGGGAGCGCAGGCGGACCGGCAAGTTGGAAGTGAAATCCATGGGCTC<br>AACCCGTGAATTGCTTTCAAACCTGCTGGCCTTGAGTAGTGCAGAGGTAGGTGGAATCCCGG    | 24.09 |
| 72 | TACGGAGGATCCAAGCGTTATCCGGATTTATTGGGTTTAAAGGGTGCGTAGGCGGTTTAGTAAGTCAGCGGTGAAATTTTGGTGCTTAA<br>CACCAAACGTGCCGTTGATACTGCTGGGCTAGAGAGTAGTTGCGGTAGGCGGAATGTATGG | 23.91 |
| 73 | TACGTATGGTGCAAGCGTTATCCGGATTTACTGGGTGTAAGGGAGCGCAGGCGGAAGGCTAAGTCTGATGTGAAAGCCCGGGGCTC<br>AACCCCGGTAAGTGCATTGAAACTGGTCTCTAGAGTGTCCGAGGGGTAAGTGGAAATTCCTAG  | 23.69 |
| 74 | TACGGAGGATCCAAGCGTTATCCGGATTTATTGGGTTTAAAGGGTGCGTAGGCGGTTTGATAAGTTAGAGGTGAAATACCGGGGCTCA<br>ACTCCGGAAGTGCCTCTAATACTGTTGAACTAGAGAGTAGTTGCGGTAGGCGGAATGTATGG | 23.48 |
| 75 | TACGTAGGTGGCAAGCGTTGTCCGGATTTACTGGGTGTAAGGGCGTGTAGCCGGGAAGGCAAGTCAGATGTGAAATCCACGGGCTC<br>AACTCGTGAAGTGCATTTGAAACTGTTTTCTTGAGTATCCGAGAGGCAATCGGAATTCCTAG   | 23.31 |
| 76 | TACGTAGGTGGCAAGCGTTGTCCGGAATTACTGGGTGTAAGGGAGTGTAGGCGGGATATCAAGTCAGAAGTGAAAATTACGGGCTC<br>AACTCGTAACTGCTTTTGAAGTGCATTCTTGAGTGAAGTAGAGGCAAGCGGAATTCCTAG     | 23.07 |
| 77 | TACGTATGGGGCAAGCGTTATCCGGATTTACTGGGTGTAAGGGAGCGTAGGCGGCATGGCAAGTCAGAAGTGAAAGCCTGGGGCTC<br>AACCCCGGAATTGCTTTTGAAGTGTGAGGCTAGAGTGTCCGAGGGGTAAGCGGAATTCCTAG   | 23.05 |
| 78 | TACGTAGGTGGCAAGCGTTGTCCGGATTTACTGGGTGTAAGGGCGTGTAGCCGGGAGGGCAAGTCAGATGTGAAATCCACGGGCTC<br>AACTCGTGAAGTGCATTTGAAACTACTCTTCTTGAGTATCCGAGAGGCAATCGGAATTCCTAG  | 23.02 |
| 79 | TACGGAGGATCCGAGCGTTATCCGGATTTATTGGGTTTAAAGGGAGCGTAGATGGATGTTAAGTCAGTTGTGAAAGTTTGGGCTCA<br>ACCGTAAAATTGCAGTTGATACTGGATGTCTTGAGTGCAGTTGAGGAGGCGGAATTCGTTG    | 23.01 |
| 80 | TACGTAGGGGGCAAGCGTTATCCGGATTTACTGGGTGTAAGGGAGCGTAGACGGCGACGCAAGTCTGAAGTGAAATACCGGGGCTC<br>AACCTGGGAAGTGCATTTGAAACTGTGTTGCTAGAGTGTGGAGAGGTAAGCGGAATTCCTAG   | 23.01 |
| 81 | AACGTAGGGTGCAAGCGTTGTCCGAATTACTGGGTGTAAGGGAGCGCAGGCGGATTGGCAAGTTGGGAGTGAAATCTATGGGCTC<br>AACCCATAAATTGCTTTCAAACCTGTCAGTCTTGAGTGGTGTAGAGGTAGGCGGAATCCCGG    | 22.98 |
| 82 | TACGTAGGGGGCAAGCGTTATCCGGATTTACTGGGTGTAAGGGAGCGTAGACGGCTGTGCAAGTCTGAAGTGAAAGGCATGGGCTC<br>AACCTGTGGACTGCTTTGAAACTGTGCAGCTAGAGTGTCCGAGAGGTAAGTGGAAATTCCTAG  | 22.93 |
| 83 | TACGTAGGTGGCAAGCGTTGTCCGGATTTACTGGGTGTAAGGGCGTGCAGCCGGGCATGCAAGTCAGATGTGAAATCTCAGGGCTTA<br>ACCCTGAAACTGCATTTGAAACTGTATGTCTTGAGTGCCGAGAGGTAATCGGAATTCCTTG   | 22.76 |
| 84 | TACGTAGGTGGCGAGCGTTGTCCGGAATTATTGGGCGTAAAGAGCATGTAGGCGGCTTAATAAGTCGAGCGTGAAAATGCGGGGCTC<br>AACCCCGTATGGCGCTGGAAACTGTTAGGCTTGAGTGCAGGAGAGGAAAGGGGAATCCCACT  | 22.75 |
| 85 | TACGTAGGTGACAAGCGTTGTCCGGATTTACTGGGTGTAAGGGCGCGTAGGCGGACTGTCAAGTCAGTCTGAAATACCGGGGCTTA<br>ACCCCGGGGCTGCGATTGAAACTGACAGCCTTGAGTATCCGAGAGGAAAGCGGAATTCCTAG   | 22.63 |
| 86 | TACGGAGGATCCGAGCGTTATCCGGATTTATTGGGTTTAAAGGGAGCGTAGGCGGACTATTAAGTCAGCTGTGAAAGTTTGGGCTCA<br>ACCGTAAAATTGCAGTTGATACTGGTCTGCTTGAGTGCAGTAGAGGTAGGCGGAATTCGTTG  | 22.54 |
| 87 | TACGTAGGTCCCGAGCGTTATCCGGATTTATTGGGCGTAAAGCGAGCGCAGGCGTTAGATAAGTCTGAAGTTAAAGGCTGTGGCTTA<br>ACCATAGTACGCTTTGAAACTGTTAACTTGAGTGCAGAAGGGGAGAGTGGAAATTCATGT    | 22.34 |
| 88 | TACGTATGGTGCAAGCGTTATCCGGATTTACTGGGTGTAAGGGTGCGTAGGTGGCAAGGCAAGTCTGAAGTGAAAATCCGGGGCTCA<br>ACCCCGGAAGTGCATTTGAAACTGTTAGCTGGAGTACAGGAGAGGTAAGTGGAAATTCCTAG  | 22.26 |

|     |                                                                                                                                                              |       |
|-----|--------------------------------------------------------------------------------------------------------------------------------------------------------------|-------|
| 89  | TACGTAGGGGGCAAGCGTTATCCGGATTTACTGGGTGTAAGGGAGCGTAGACGGCATGGCAAGCCAGATGTGAAAGCCCGGGGCTC<br>AACCCCGGGACTGCATTTGAACTGTCAGGCTAGAGTGTCCGAGAGGAAAGCGGAATTCCTAG     | 22.23 |
| 90  | TACGGAGGATCCGAGCGTTATCCGGATTTATTGGGTTTAAAGGGAGCGTAGATGGGTTGTTAAGTCAGTTGTGAAAGTTTGC GGCTCA<br>ACCGTAAAATTGCAATTGATACTGGCAGTCTTGAGTACAGTTGAGGTAGGCGGAATTCGTGG  | 22.14 |
| 91  | TACGGAGGGTGCAGCGTTAATCGGAATAACTGGGCGTAAAGGGCACGCAGGCGGTGACTTAAGTGAGGTGTGAAAGCCC CGGGCTT<br>AACCTGGGAATTGCATTTCATACTGGGTCGCTAGAGTACTTTAGGGAGGGGTAGAATTCACG    | 21.94 |
| 92  | TACGTAGGTGGCAAGCGTTGTCCGGATTTACTGGGTGTAAGGGCGTGCAGCCGGGCCGCAAGTCAGATGTGAAATCTGGAGGCTT<br>AACCTCCAACTGCATTTGAACTGTAGGTCTTGAGTACCGGAGAGGTTATCGGAATTCCTTG       | 21.93 |
| 93  | TACGGAGGATGCGAGCGTTATCCGGATTTATTGGGTTTAAAGGGTGC GTAGGCGGCACGCCAAGTCAGCGGTGAAATTTTCGGGCTCA<br>ACCCGACTGTGCCGTTGAACTGGCGAGCTAGAGTGCACAAGAGGCAGGCGGAATGCGTGG    | 21.87 |
| 94  | TACGTATGGAGCAAGCGTTATCCGGATTTACTGGGTGTAAGGGAGTGTAGGTGGTATCACAAGTCAGAAGTGAAAGCCC GGGGCTC<br>AACCCCGGGACTGCTTTTGAACTGTGGAAGTGGAGTGCAGGAGAGGTAAGTGGAAATTCCTAG   | 21.71 |
| 95  | TACGGAGGATCCGAGCGTTATCCGGATTTATTGGGTTTAAAGGGTGC GTAGGCGGCCTTTTAAAGTCAGCGGTGAAAGTCTGTGGCTCA<br>ACCATAGAATTGCCGTTGAACTGGGAGGCTTGAGTATGTTTGAGGCAGGCGGAATGCGTGG  | 21.65 |
| 96  | TACGTAGGGGGCAAGCGTTATCCGGATTTACTGGGTGTAAGGGAGCGTAGACGGTTTTGCAAGTCTGAAGTGAAAGCCC GGGGCTT<br>AACCCCGGGACTGCTTTGAACTGTAGGACTAGAGTGCAGGAGAGGTAAGTGGAAATTCCTAG    | 21.60 |
| 97  | TACGTAGGTGGCAAGCGTTGTCCGGAATTACTGGGTGTAAGGGAGCGTAGGCGGGGAGGCAAGTTGAATGTCTAAACTATCGGCTC<br>AACTGATAGTCGCGTTCAAACTGCCACTCTTGAGTGCAGTAGAGGTAGGCGGAATTCCTAGT     | 21.20 |
| 98  | TACGTAGGGGGCGAGCGTTATCCGGATTTACTGGGTGTAAGGGAGCGTAGACGGCGTATCAAGTCTGATGTGAAAGGCAGGGGCTT<br>AACCCCTGGACTGCATTGAACTGGTATGCTTGAGTGCCGGAGGGGTAAGCGGAATTCCTAG      | 20.85 |
| 99  | TACGTAGGGAGCAAGCGTTATCCGGATTTACTGGGTGTAAGGGCGCGCAGGCGGGCCGGTAAGTTGGAAGTGAAATCTATGGGCTT<br>AACCCATAAACTGCTTTCAAACTGCTGGTCTTGAGTGATGGAGAGGCAGGCGGAATTCCTG      | 20.78 |
| 100 | TACGGAGGATCCAAGCGTTATCCGGATTTATTGGGTTTAAAGGGTGC GTAGGCGGTTTTGATAAGTTAGAGGTGAAATACCGGTGCTTA<br>ACACCGGAAGTGCCTCTAATACTGTTGAACTAGAGAGTAGTTGCGGTAGGCGGAATGTATGG | 20.75 |
